# Supplementary material
Source: PubMed Central journal article supplement (PMC3553601)

**Supplementary Figures 22-31.** SNP array data indicating genome-wide DNA copy number. Genome-wide single nucleotide polymorphism arrays were used to discern DNA copy number changes relative to normal DNA (isolated from normal blood donated by five individual, disease-free women and then pooled (N)). Each patient's tumor (P) and the corresponding tumorgraft (X) (and, in some cases tumor grafts that were serially passaged five times; X1 or X5, respectively) are indicated on the left. A copy number of 2 (normal) is indicated by gray; copy number greater than 2 (chromosomal gain or amplification) is shown in red; and copy number less than 2 (chromosomal loss or deletion) is shown in blue. The position of the copy number variants across the 22 autosomal chromosomes and 2 sex chromosomes is depicted at the bottom. Note the common low copy number of the Y chromosome (all patients and normal donors were females).

HCI-001

Supplementary Figure 22

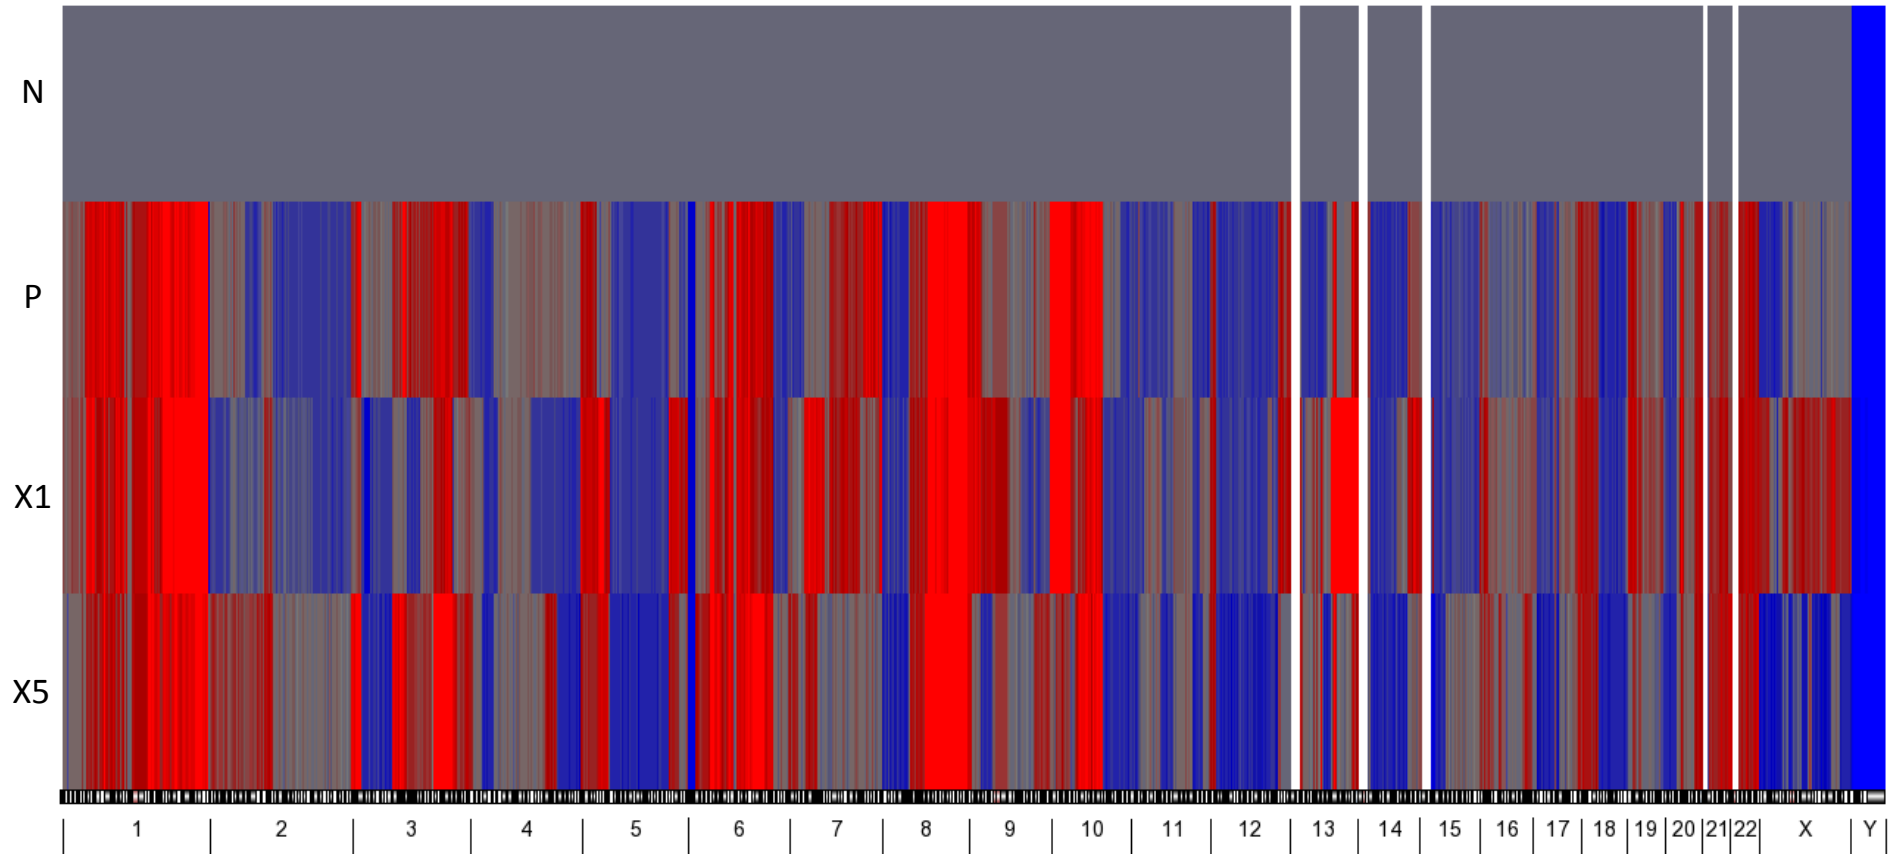

HCI-002

Supplementary Figure 23

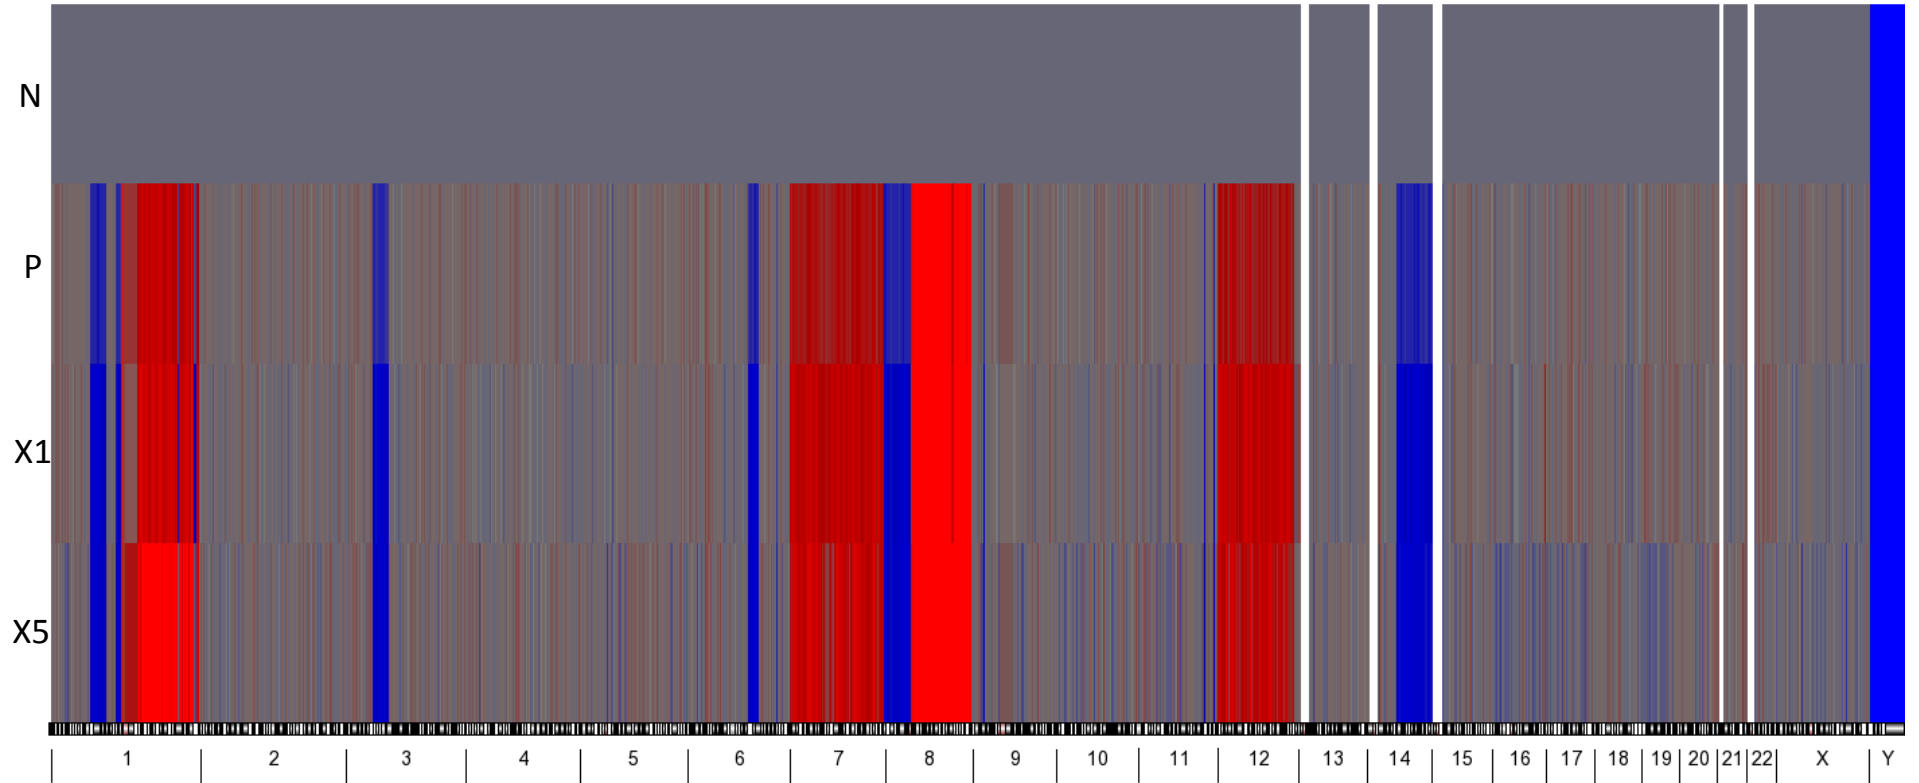

HCI-003

Supplementary Figure 24

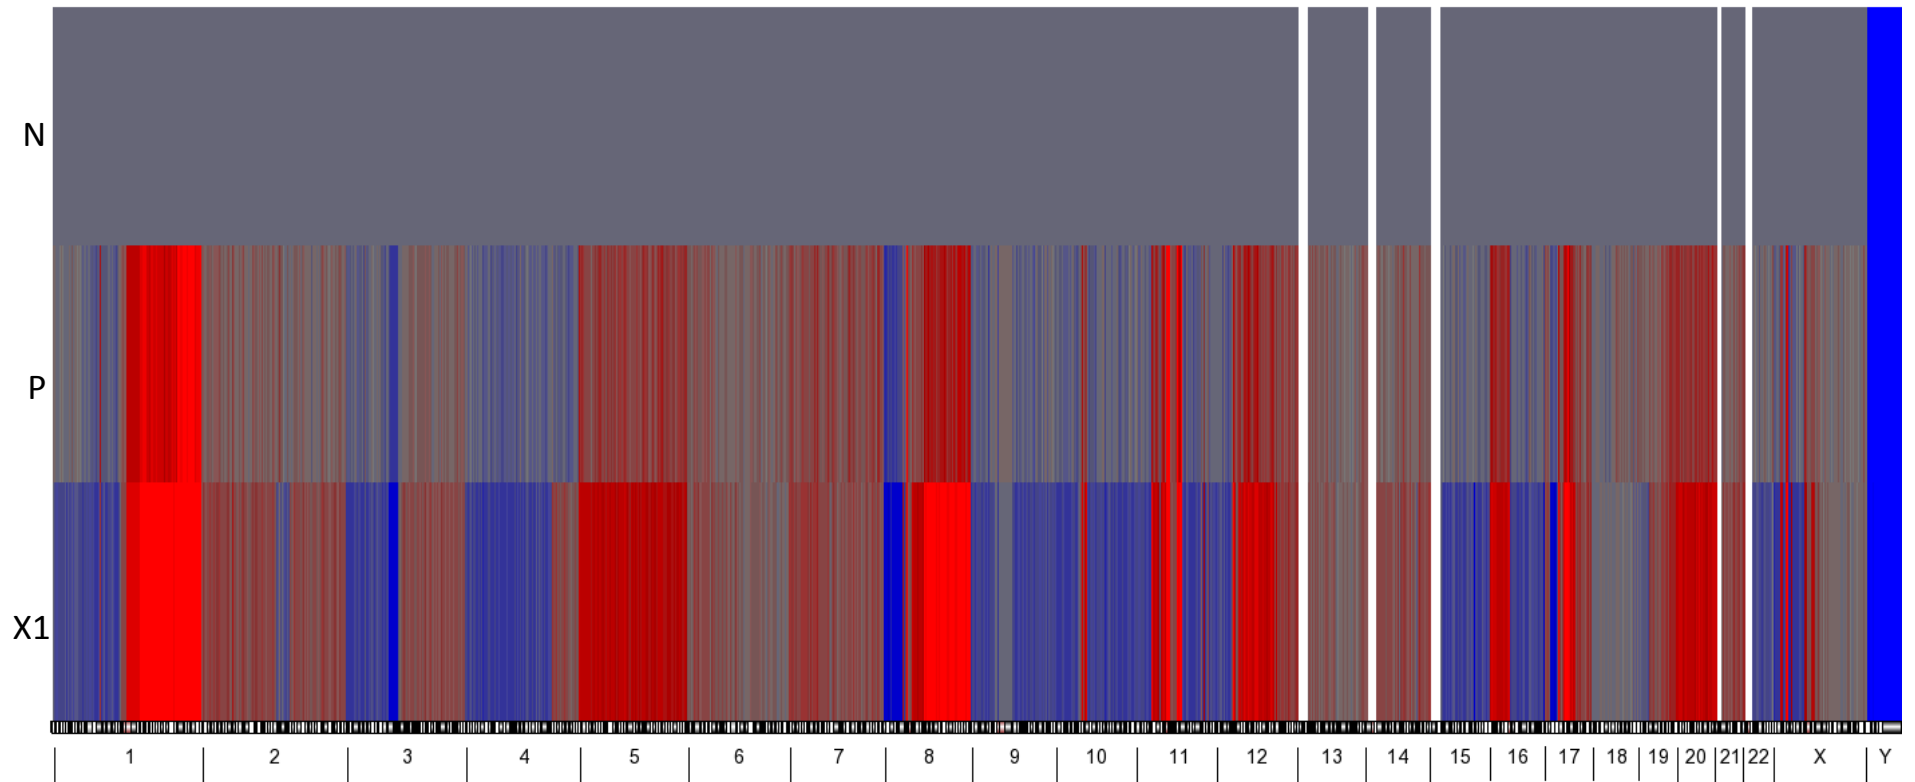

HCI-004

Supplementary Figure 25

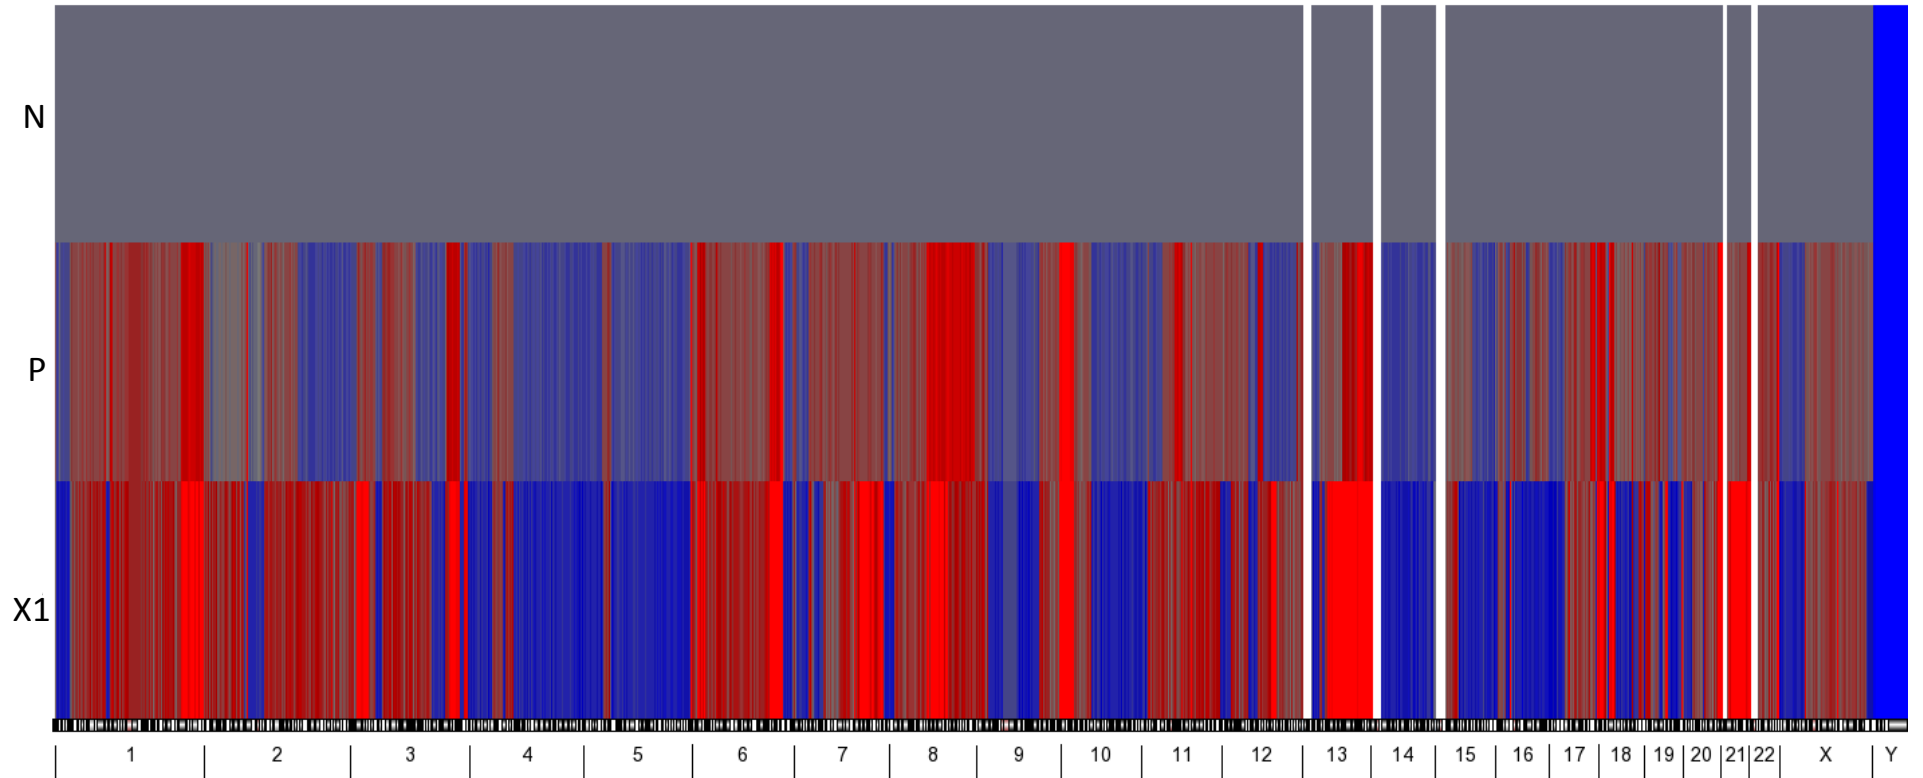

HCI-005

Supplementary Figure 26

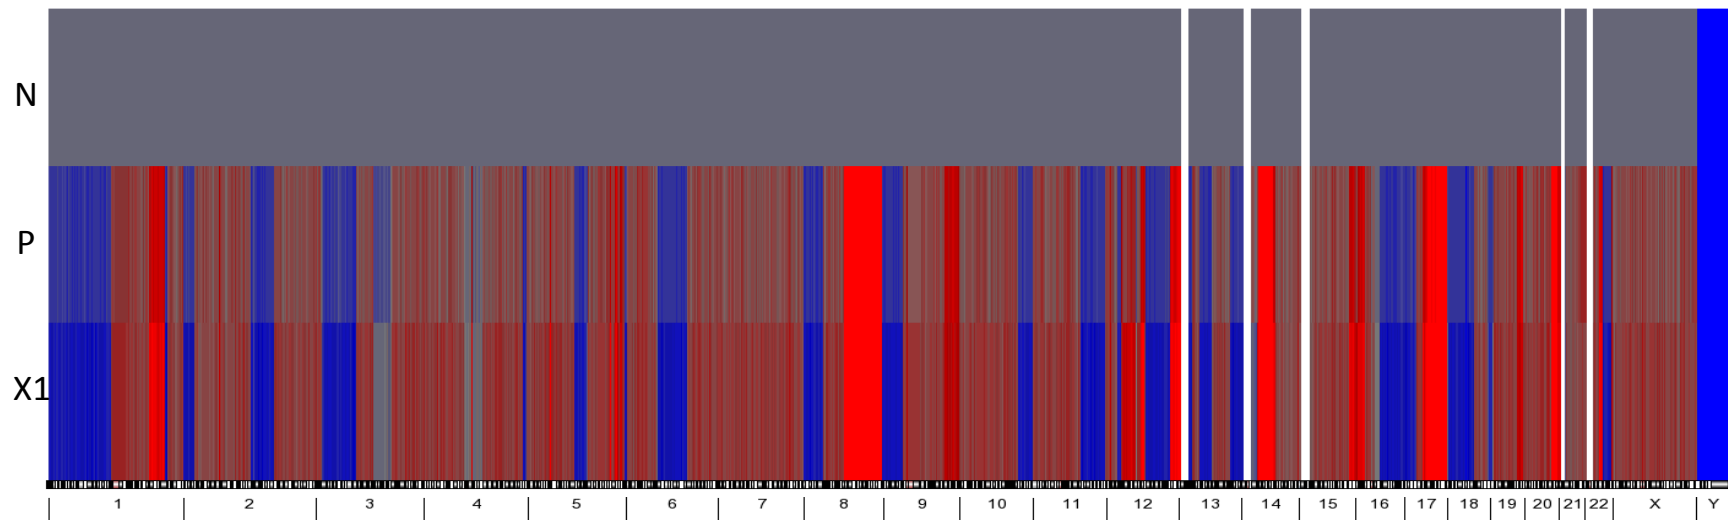

HCI-007

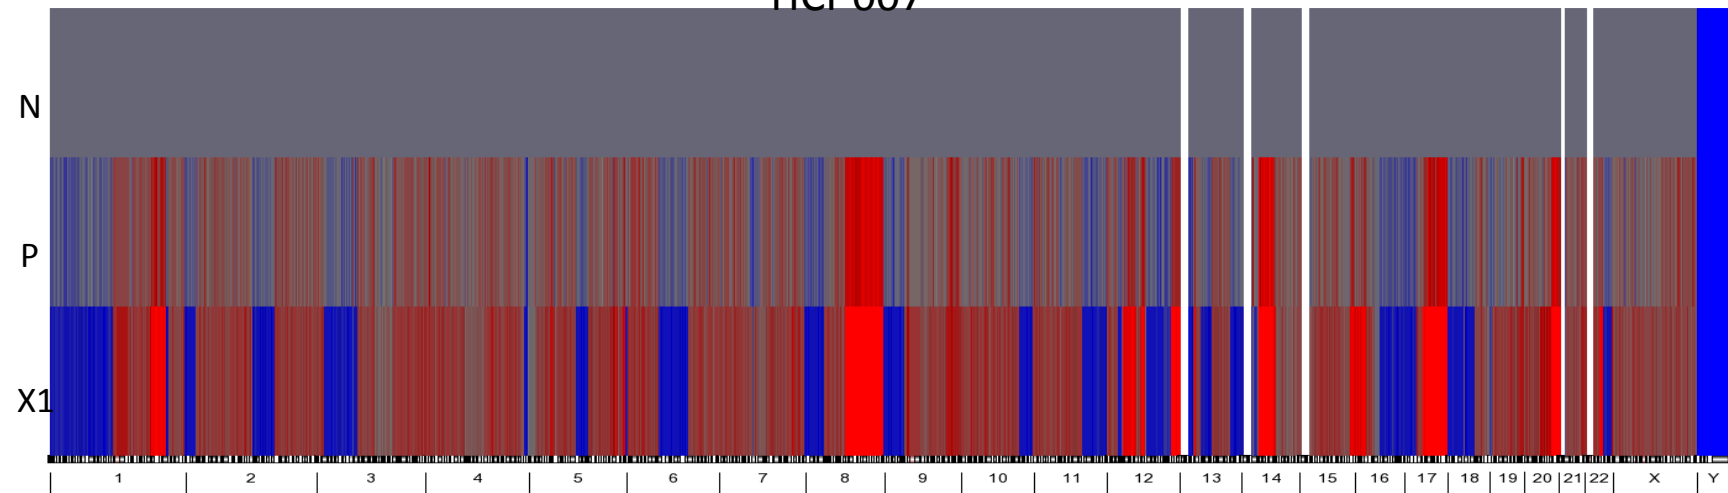

**Additional information for Supplementary Figure 26.** SNP array data indicating genome-wide DNA copy number points to the stability of tumor cells and subsequent tumor grafts from the same patient. Data are presented in the same manner as in Supplementary Figures 22-31, except that two samples and subsequent tumor grafts are shown from the same patient. HCI-005 was obtained first, and HCI-007 was obtained 8 months later, during a relapse (See Supplementary Table 1).

HCI-008

Supplementary Figure 27

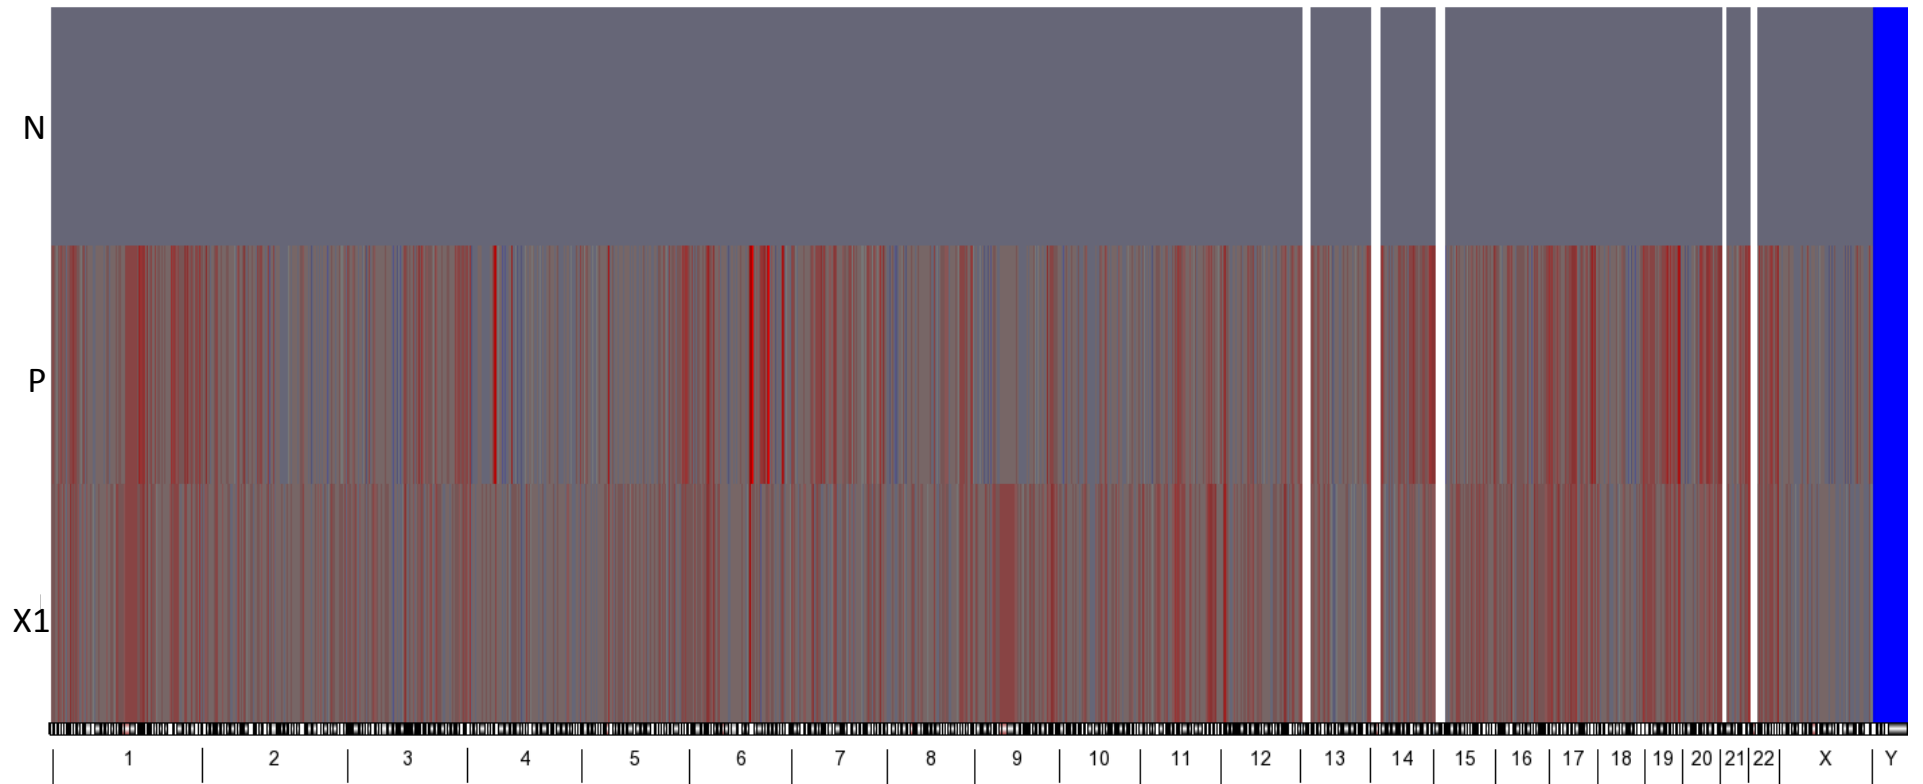

HCI-009

Supplementary Figure 28

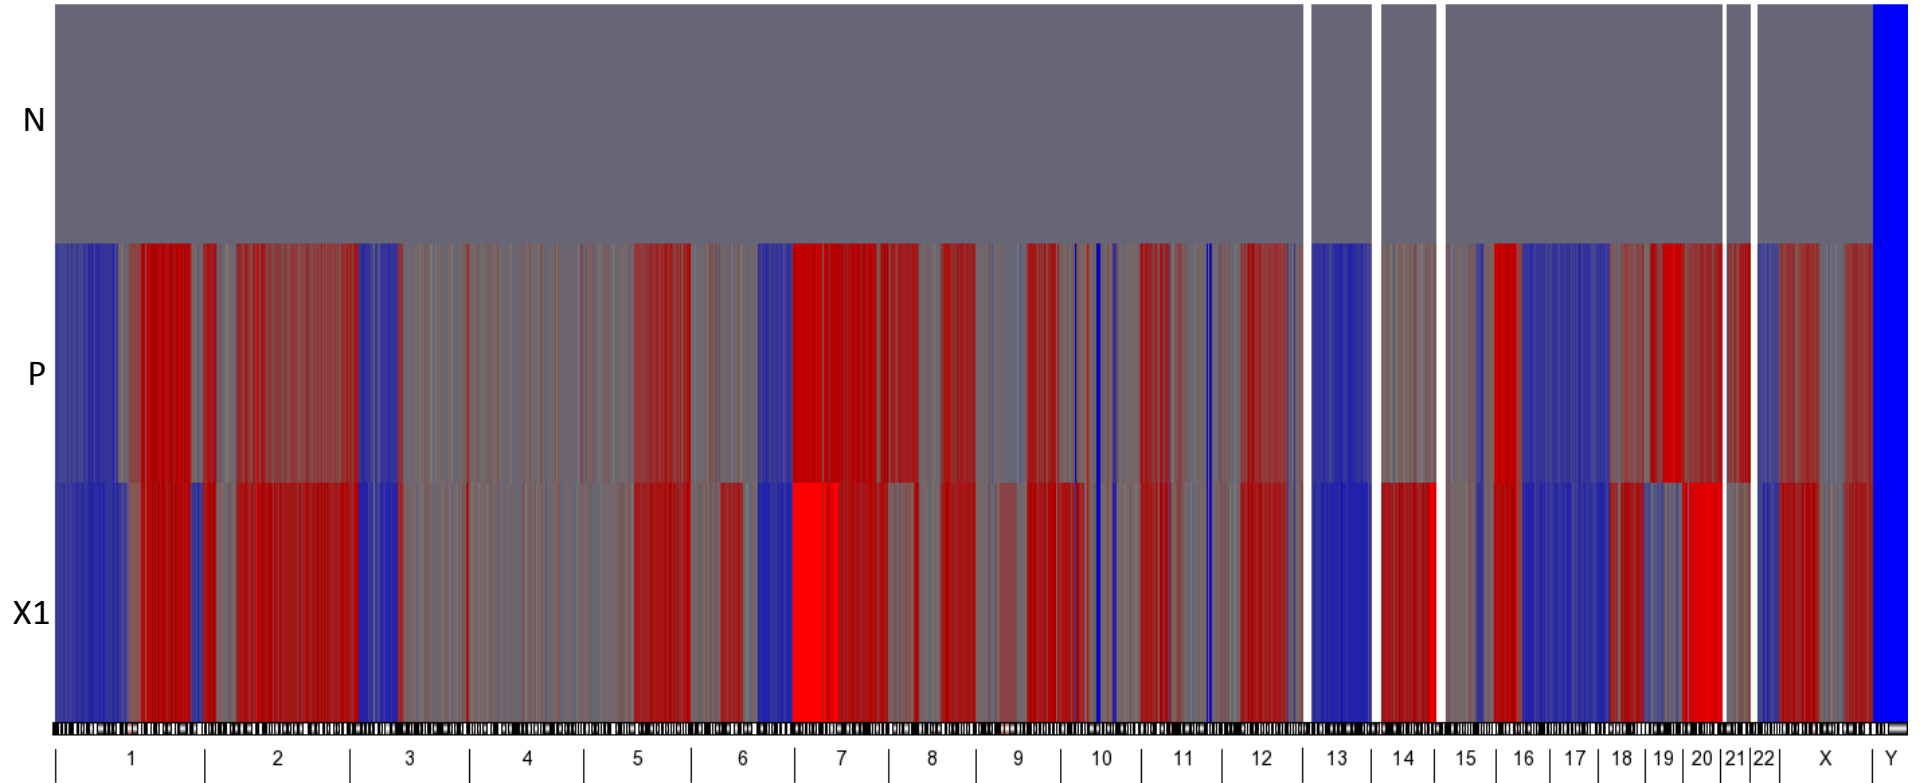

HCI-010

Supplementary Figure 29

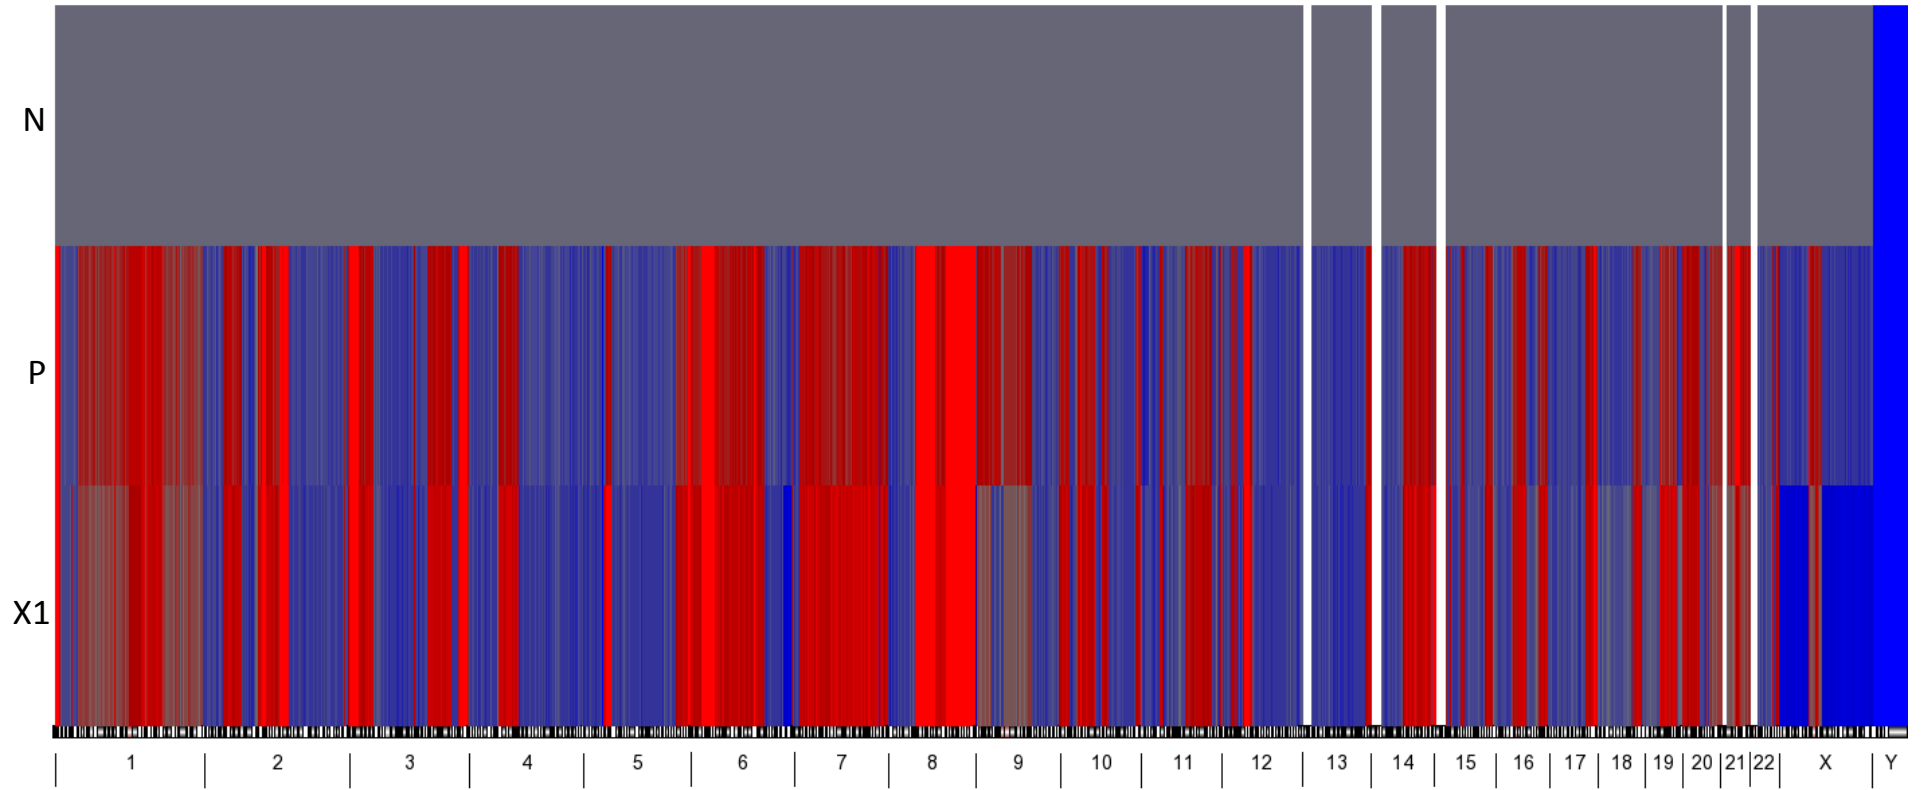



HCI-011

Supplementary Figure 30

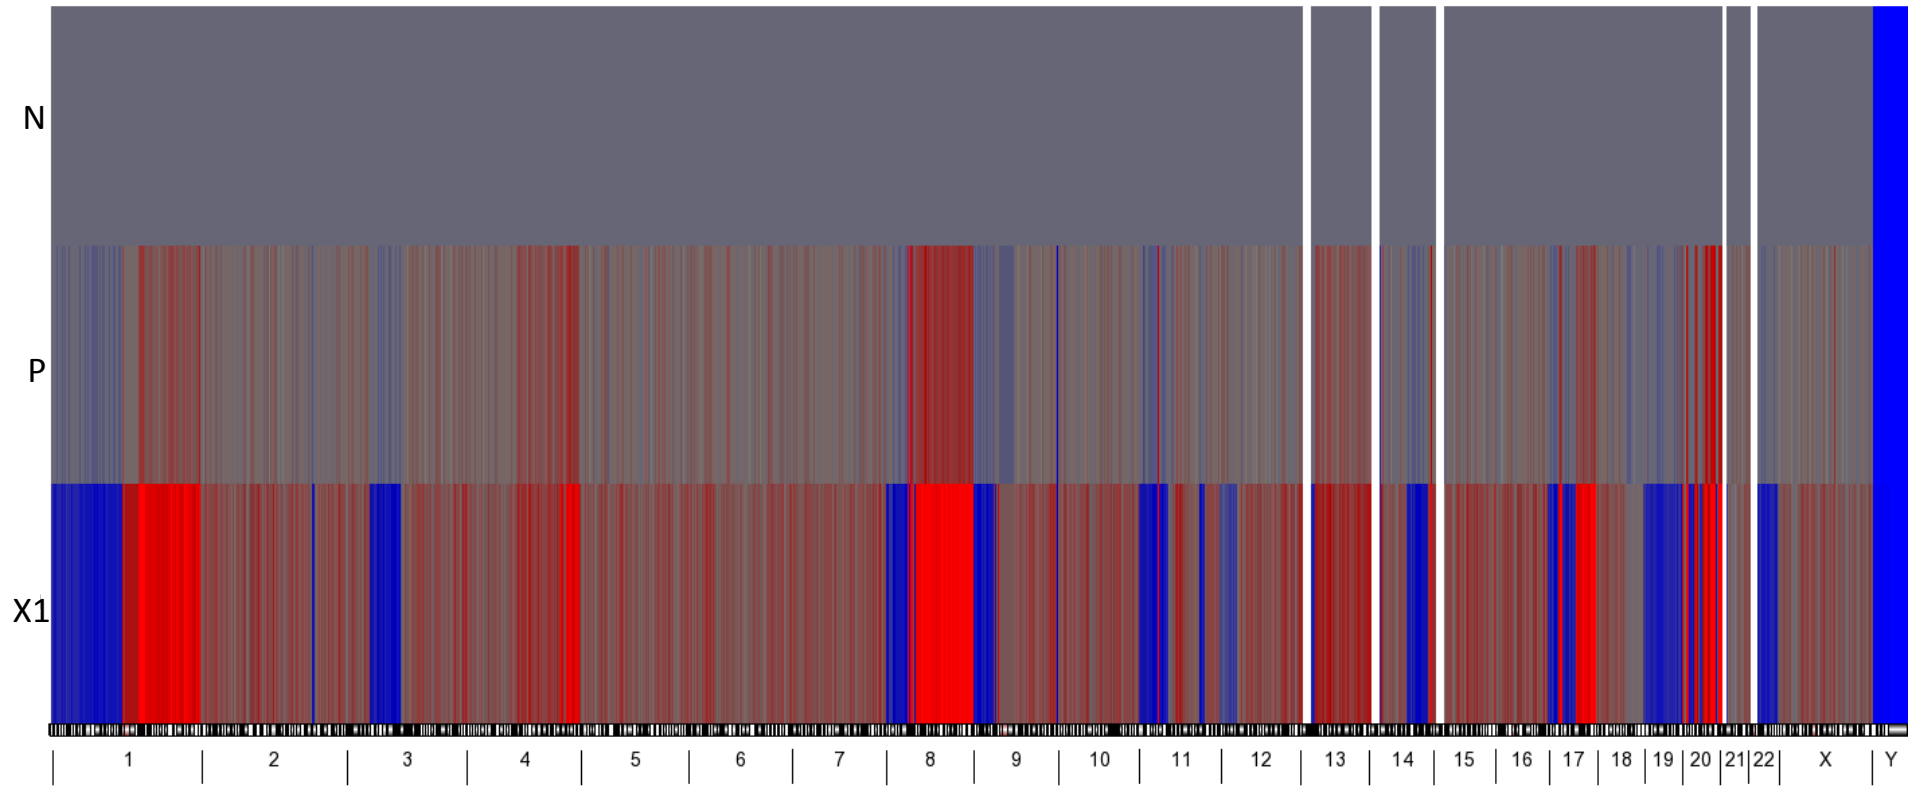

HCI-012

Supplementary Figure 31

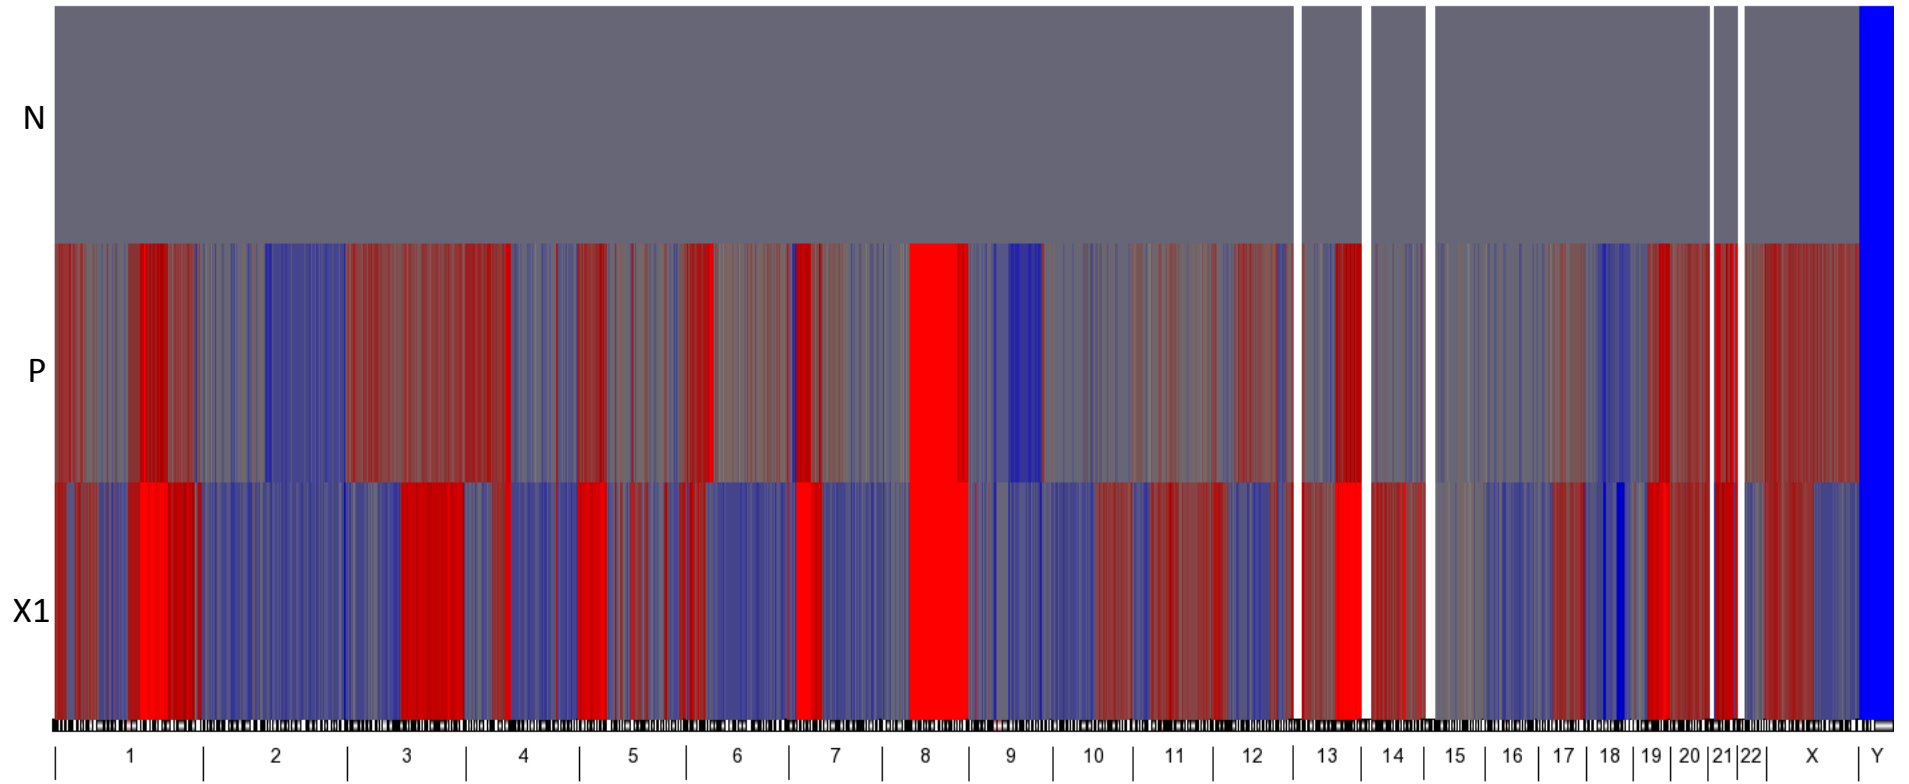

Supplement: NIHMS428588-supplement-Suppl_Figures_22-31.pdf [file NIHMS428588-supplement-Suppl_Figures_22-31.pdf]
