# Supplementary material
Source: PubMed Central journal article supplement (PMC3553601)
Supplement: NIHMS428588-supplement-Suppl_Figure_32.pdf [file NIHMS428588-supplement-Suppl_Figure_32.pdf]

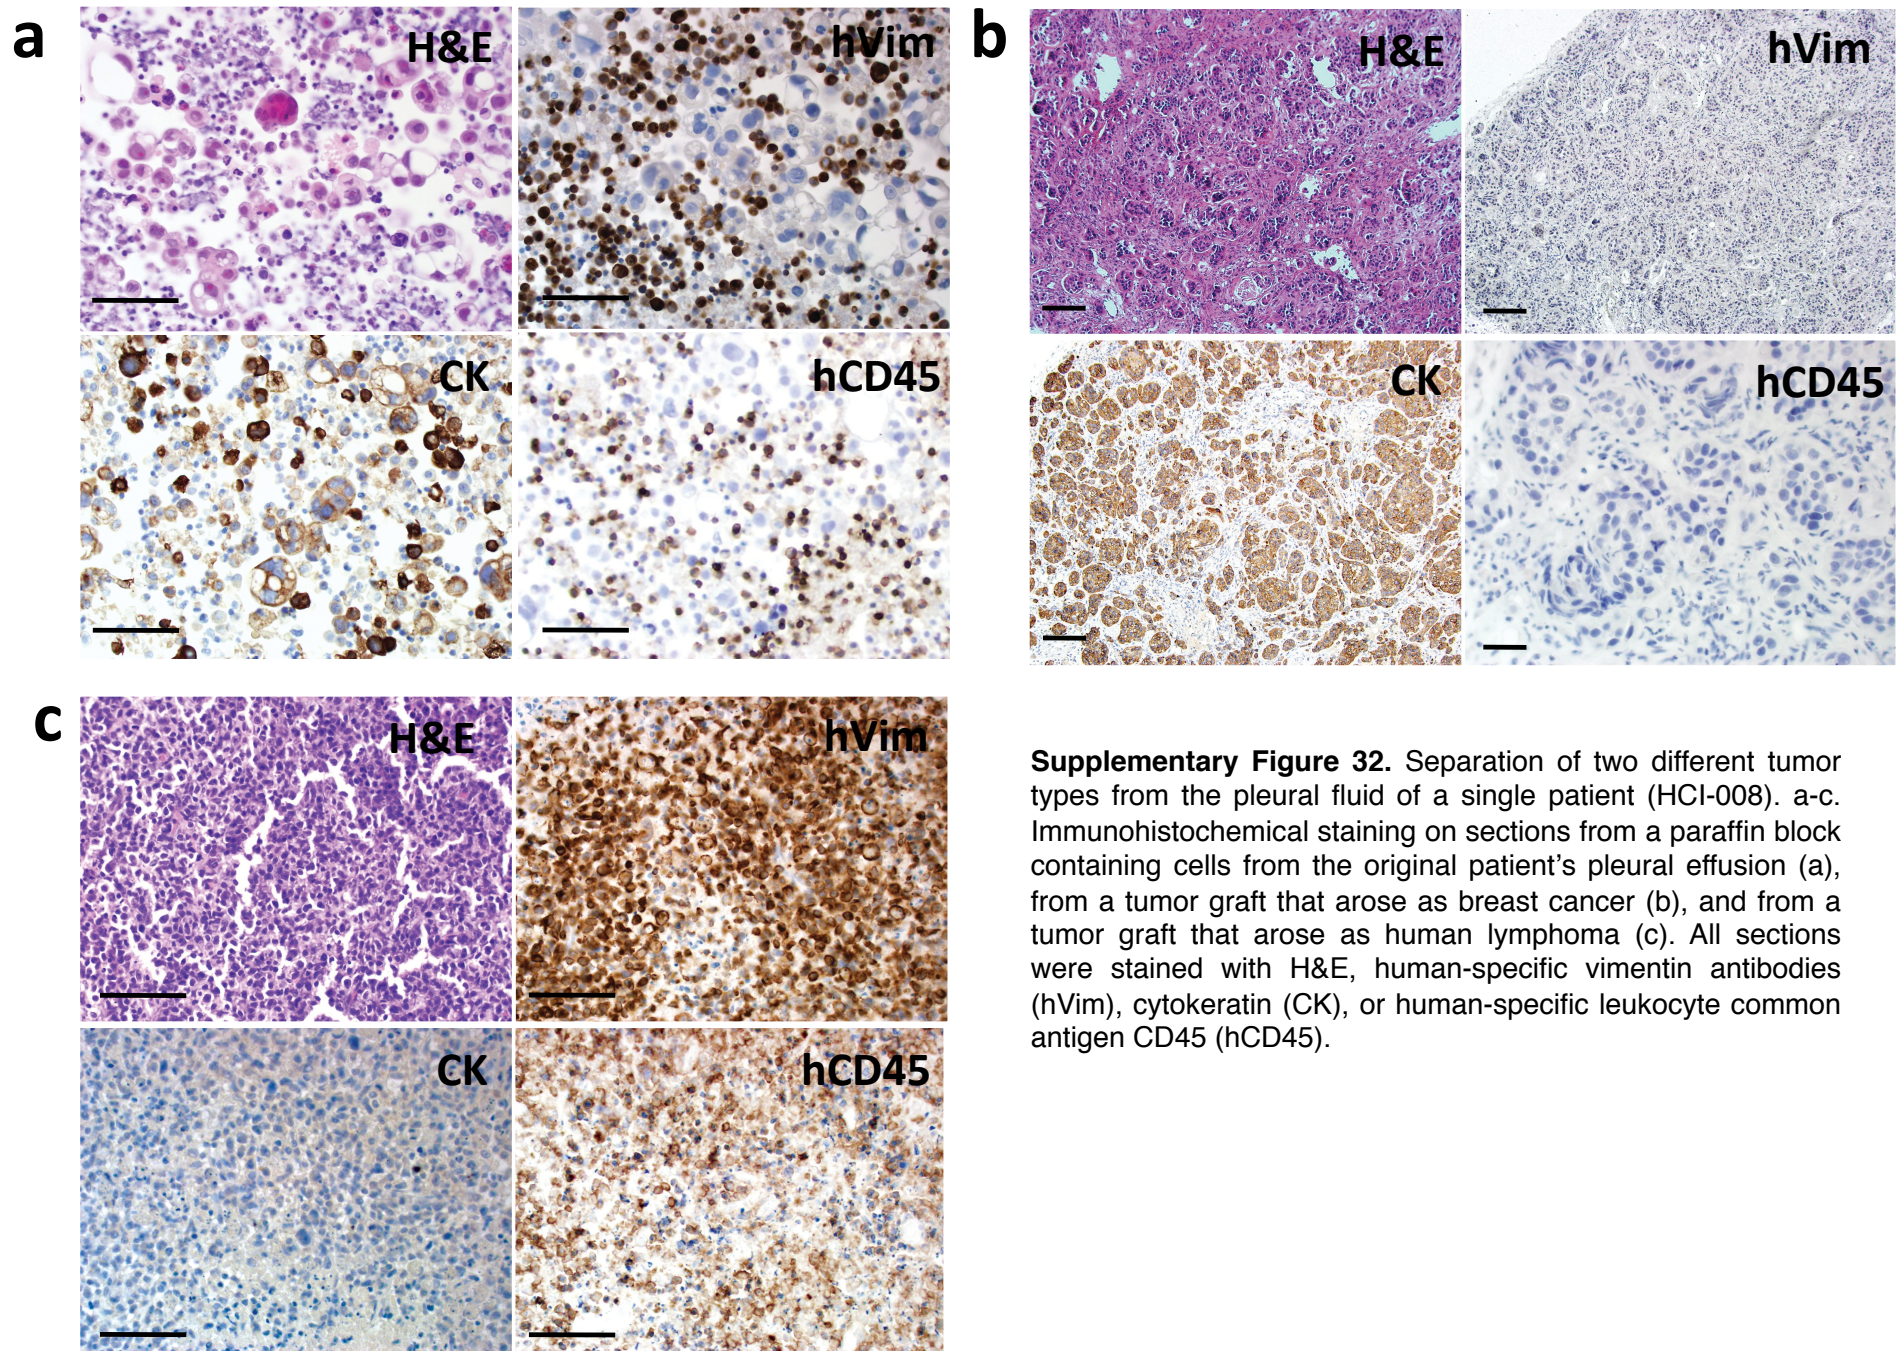

**Supplementary Figure 32.** Separation of two different tumor types from the pleural fluid of a single patient (HCI-008). a-c. Immunohistochemical staining on sections from a paraffin block containing cells from the original patient's pleural effusion (a), from a tumor graft that arose as breast cancer (b), and from a tumor graft that arose as human lymphoma (c). All sections were stained with H&E, human-specific vimentin antibodies (hVim), cytokeratin (CK), or human-specific leukocyte common antigen CD45 (hCD45).
