# Supplementary material
Source: PubMed Central journal article supplement (PMC3553601)
Supplement: NIHMS428588-supplement-Suppl_Table_1.pdf [file NIHMS428588-supplement-Suppl_Table_1.pdf]

Supplementary Table 1. Description of tumors and corresponding tumor grafts.

| Patient information         |           |            |                                                                 |                                                     |                                                                                                                           |           |           |             |               |                                                     |                                                                                                                                                                                                                   |                                                     |                                | Tumor graft information |                               |           |            |             |                                                         |               |                                                                                                                                                                                                                                                                                                                                                                                               |                                              |                             |                      |                               |
|-----------------------------|-----------|------------|-----------------------------------------------------------------|-----------------------------------------------------|---------------------------------------------------------------------------------------------------------------------------|-----------|-----------|-------------|---------------|-----------------------------------------------------|-------------------------------------------------------------------------------------------------------------------------------------------------------------------------------------------------------------------|-----------------------------------------------------|--------------------------------|-------------------------|-------------------------------|-----------|------------|-------------|---------------------------------------------------------|---------------|-----------------------------------------------------------------------------------------------------------------------------------------------------------------------------------------------------------------------------------------------------------------------------------------------------------------------------------------------------------------------------------------------|----------------------------------------------|-----------------------------|----------------------|-------------------------------|
| Sample ID                   | Tissue ID | Patient ID | Source                                                          | Primary Diagnosis                                   | Systemic treatment (up to time of sample collection)                                                                      | ER status | PR status | HER2 status | PAM50 subtype | FFPE block                                          | Pathological features                                                                                                                                                                                             | Other IHC results                                   | Clinical metastasis            | Vital Status            | Sample ID                     | ER status | PR status  | HER2 status | Time to grow to 2 cm in NOD.SCID (and NSG, if known)    | PAM50 subtype | Pathological Features                                                                                                                                                                                                                                                                                                                                                                         | Other IHC results                            | Estrogen Dependence         | Metastasis           | Current transplant generation |
| HCI-001 (Fig.2)             | 070412    | YOACPS     | 1 <sup>st</sup> breast tumor collected/implanted June 2007      | IDC; June 2007; Stage 4                             | None                                                                                                                      | neg       | neg       | neg         | basal-like    | available                                           | Poorly differentiated, papillary architecture, extensive necrosis. Nuclei: 3, tubules: 3, mitoses: 3 (41 per 10 HPF)=Grade III                                                                                    | CK+ Ecad+(mixed) Bcat+(memb/cyto) Vm-(mixed)        | Lung                           | Died December 2007      | HCI-001_x1 through HCI-001_x4 | neg       | neg        | neg         | NOD.SCID: 2 months                                      | basal-like    | Poorly differentiated, papillary/ciriform architecture, extensive necrosis. Nuclei: 3, tubules: 3, mitoses: 2 (35 per 10 HPF)=Grade III                                                                                                                                                                                                                                                       | CK+ Ecad+ Bcat+(memb/cyto) Vm+               | n/a                         | Lung                 | 6th                           |
| HCI-002 (Supp Fig.6)        | 0900570   | ORR2HE     | 1 <sup>st</sup> breast tumor collected/implanted February 2009  | IDC; January 2009; Stage 3A                         | None                                                                                                                      | neg       | neg       | neg         | basal-like    | available                                           | Poorly differentiated, "medullary type" (solid with lymphocytic infiltrate, pushing border), no tumor necrosis. Nuclei: 3, tubules: 3, mitoses: 3 (25 per 10 HPF)=Grade III                                       | CK+(mixed) Ecad+(weak) Bcat+(memb/cyto) Vm-(mixed)  | LN                             | Died December 2009      | HCI-002_x1 through HCI-002_x7 | neg       | neg        | neg         | NOD.SCID: 1 month                                       | basal-like    | Syncytial sheets, no lymphocytes, moderate tumor necrosis. Nuclei: 2, tubules: 3, mitoses: 3 (14-55 per 10 HPF)=Grade III                                                                                                                                                                                                                                                                     | CK+(mixed) Ecad+ Bcat+(memb/cyto) Vm-(mixed) | n/a                         | LN                   | 7th                           |
| HCI-003 (Supp Fig.6)        | 0903293   | 3BW6YS     | 1 <sup>st</sup> breast tumor collected/implanted May 2009       | IDC; May 2009; Stage 3A                             | None                                                                                                                      | pos       | pos       | neg         | luminal B     | available                                           | Invasive ductal carcinoma and high grade micropapillary DCIS; sclerotic stroma with chronic inflammatory reaction. Nuclei: 3, tubules: 2, mitoses: 3 (24 per 10 HPF)=Grade III                                    | CK+ Ecad+ Bcat+(memb) Vm-                           | LN                             | Alive                   | HCI-003_x1 through HCI-003_x6 | pos       | pos        | neg         | NOD.SCID: 4 months (1cm)                                | luminal B     | Invasive ductal carcinoma with sclerotic stroma. No necrosis. Nuclei: 3, tubules: 3 (24 per 10 HPF)=Grade III                                                                                                                                                                                                                                                                                 | CK+ Ecad+ Bcat+(memb) Vm-                    | Yes                         | Lung, LN             | 6th                           |
| HCI-004 (Supp Fig.7)        | 0907177   | N12K3Y     | 1 <sup>st</sup> breast tumor collected/implanted September 2009 | IDC; July 2009; Stage 2A                            | None                                                                                                                      | neg       | neg       | neg         | basal-like    | available                                           | Invasive ductal carcinoma, poorly diff. with peritumoral invasion, possible lymphovascular invasion and sclerotic stroma. DCIS is also present. Tubules: 3, Nuclei: 2, Mitoses: 3 (22 per 10 HPF)=Grade III       | CK+ Ecad+ Bcat+(memb/cyto) Vm-                      | not detected                   | Alive                   | HCI-004_x1 through HCI-004_x4 | neg       | neg        | neg         | NOD.SCID:4 months (up to 1cm) NSG, 5 months (up to 2cm) | basal-like    | Poorly differentiated malignancy, consistent with invasive ductal carcinoma. Tubules: 3, Nuclei: 3, Mitoses: 3 (40 per 10 HPF)=Grade III                                                                                                                                                                                                                                                      | CK+ Ecad+ Bcat mixed Vm-                     | n/a                         | None                 | 4th                           |
| HCI-005 (Supp Fig.8)        | 1007496   |            | Pleural Effusion collected/implanted December 2008              |                                                     | doxorubicin; cyclophosphamide; tamoxifen; letrozole; zoledronic acid; fulvestrant; capecitabine; trastuzumab; vinorelbine |           |           |             |               |                                                     |                                                                                                                                                                                                                   |                                                     |                                |                         | HCI-005_x1 through HCI-005_x3 |           |            |             | NOD.SCID: 5 months (1cm)                                |               | Pleomorphic-type ILC. Poorly differentiated with vague papillary features; tumor necrosis and single cell necrosis. Nested cells, some papillary structures. Tubules: 3, Nuclei: 3, Mitoses: 3 (12 per 10 HPF)=Grade III                                                                                                                                                                      |                                              | Yes                         | Lung, LN, peritoneum | 3rd                           |
| HCI-006                     | 0908097   | 79NTL6     | Pleural Effusion-tap 3 collected/implanted October 2009         | mixed IDC and ILC; March 2001; Stage 2B             | added paclitaxel; iposomol; doxorubicin; gemtastine; carboplatin                                                          | pos       | pos       | pos         | luminal B     | not available                                       | Cytosin: Highly atypical cells with large irregular nuclei, which look malignant. There is abundant cytoplasm and intracytoplasmic inclusions are seen. Emperipolesis is present.                                 | n/a                                                 | Lung, bone                     | Died May 2011           | HCI-006_x1 through HCI-006_x4 | pos       | pos        | pos         | NOD.SCID: 6 months                                      | luminal B     | Classical-type ILC. Cells are nested, and have intermediate to large nuclei with vesicular chromatin and prominent nucleoli; abundant eosinophilic cytoplasm; some nuclei have "salt and pepper" chromatin and raise the possibility of neuroendocrine differentiation; there is tumor necrosis and single cell necrosis present. Tubules: 3, Nuclei: 3, Mitoses: 3 (15 per 10 HPF)=Grade III | CK+ Ecad+ Bcat+(memb/cyto) Vm-               | not yet tested              | Lung, LN, peritoneum | 4th                           |
| HCI-007                     | 0908263   |            | Pleural Effusion-tap 4 collected/implanted October 2009         |                                                     |                                                                                                                           |           |           |             |               |                                                     |                                                                                                                                                                                                                   |                                                     |                                |                         | HCI-007_x1 through HCI-007_x4 |           |            |             | NOD.SCID: 4 months                                      |               | Classical-type ILC. Nested architecture. Duct forms are seen in probably 20% of the tumor (score 2). Nuclei are intermediate to large with prominent nucleoli and abundant eosinophilic cytoplasm. Tubules: 2, Nuclei: 3, Mitoses: 3 (16 per 10 HPF)=Grade III                                                                                                                                |                                              | not yet tested              | Lung, LN, bone       | 4th                           |
| HCI-008 (Supp Fig.9 and 15) | 1007649   | 24PSK3     | Pleural Effusion collected/implanted January 2009               | Inflammatory breast cancer; December 2007; Stage 2B | 5-fluorouracil; capecitabine                                                                                              | neg       | neg       | pos         | basal-like    | available                                           | Cell block: Single cells and small clusters of cells with large nuclei, prominent nucleoli, but abundant cytoplasm, some vacuolated                                                                               | cell block: CK+ Ecad+ (mixed) Bcat+ (memb/cyto) Vm- | Skin, lung                     | Died March 2009         | HCI-008_x1 through HCI-008_x4 | neg       | neg        | pos         | NOD.SCID: 5 months to 2cm                               | luminal B     | Clusters of malignant cells with pleomorphic nuclei and abundant eosinophilic cytoplasm (apocrine), consistent with invasive ductal carcinoma, lymphovascular invasion. Tubules: 3, Nuclei: 3, Mitoses: 2 (8 per 10 HPF)=Grade III                                                                                                                                                            | CK+ Ecad+ Bcat+(memb) Vm-                    | n/a                         | Lung, LN             | 4th                           |
| HCI-009 (Supp Fig.10)       | 0900642   | 779812     | Axilles collected/implanted February 2009                       | Poorly differentiated adenocarcinoma; June 1985     | cyclophosphamide; methotrexate; 5-fluorouracil; tamoxifen; anastrozole; paclitaxel; zoledronic acid/fulvestrant           | neg       | neg       | neg         | HER2-like     | available                                           | Nested cells with large round nuclei and abundant cytoplasm; apocrine features; single cell necrosis and high mitotic rate. Poorly differentiated. Tubules: 3, Nuclei: 2, Mitoses: 3 (17 per 10 HPF) = Grade III. | CK+ Ecad- Bcat weak(cyto) Vm+                       | LN, bone, pancreas, peritoneum | Died February 2009      | HCI-009_x1 through HCI-009_x6 | neg       | neg        | neg         | NOD.SCID: 4 months                                      | luminal B     | Nested cells with apocrine features, single cell necrosis and high mitotic rate. Poorly differentiated. Tubules: 3, Nuclei: 3, Mitoses: 3 (14 per 10)=Grade III                                                                                                                                                                                                                               | CK+ Ecad weak (cyto) Bcat- (cyto) Vm-        | n/a                         | Lung, LN, peritoneum | 6th                           |
| HCI-010 (Supp Fig.11)       | 0903211   | SUCWJ9     | Pleural Effusion collected/implanted February 2009              | IDC; February 2007; Stage 3C                        | cyclophosphamide; doxorubicin; paclitaxel; iposomol; doxorubicin; zoledronic acid; docetaxel                              | neg       | neg       | neg         | basal-like    | not available                                       | n/a                                                                                                                                                                                                               | n/a                                                 | Lung                           | Died February 2009      | HCI-010_x1 through HCI-010_x5 | neg       | borderline | neg         | NOD.SCID: 4 months                                      | basal-like    | Invasive ductal carcinoma, poorly differentiated with necrosis, some with eosinophilic cytoplasm and prominent nucleoli. Nuclei: 2, tubules: 3, mitoses: 3 (84-115 per 10 HPF)=Grade III                                                                                                                                                                                                      | CK+ Ecad+, Bcat+(memb/cyto) Vm+              | n/a                         | Lung, LN             | 5th                           |
| HCI-011 (Supp Fig.12)       | 0907163   | Y0T6JD     | Pleural Effusion collected/implanted September 2009             | IDC; September 2007; Stage 3C                       | doxorubicin; cyclophosphamide; paclitaxel; fulvestrant                                                                    | pos       | pos       | neg         | luminal B     | Primary not available. PE available as a cell block | Cytosin: Large nuclei with vesicular chromatin and prominent nucleoli. Abundant eosinophilic cytoplasm. Emperipolesis is present. There are also admixed lymphocytes and mesothelial cells.                       | n/a                                                 | LN, pleura                     | Died 2008               | HCI-011_x1 through HCI-011_x4 | pos       | pos        | neg         | NOD.SCID: 4 months                                      | luminal B     | Classical-type ILC with nested architecture. Large nuclei with vesicular chromatin and prominent nucleoli. Emperipolesis is present.                                                                                                                                                                                                                                                          | CK+ Ecad+ Bcat+-(memb/cyto) Vm-              | No, but estrogen responsive | Lung, LN             | 4th                           |
| HCI-012 (Supp Fig.13)       | 0908104   | 2SF730     | Pleural Effusion collected/implanted October 2009               | IDC; March 2007                                     | capecitabine; vinorelbine; trastuzumab; lapatinib                                                                         | neg       | neg       | pos         | luminal B     | not available                                       | Cytosin: Malignant cells with large nuclei, coarse chromatin, and prominent nucleoli; mitotic figures seen.                                                                                                       | n/a                                                 | LN, pericardium                | Died November 2009      | HCI-012_x1 through HCI-012_x6 | neg       | neg        | pos         | NOD.SCID:4 months NSG; 4 months                         | luminal B     | Poorly differentiated ductal with hyperchromatic nuclei and extensive tumor necrosis. Tubules: 3, Nuclei: 3, Mitoses: 3/61 per 10=Grade II                                                                                                                                                                                                                                                    | CK+ Ecad+ Bcat+ (memb) Vm-                   | n/a                         | LN, thymus           | 5th                           |

Abbreviations: SFU, 5-fluorouracil; Bcat, beta-catenin; CK, cytokeratin; CMF, cyclophosphamide, methotrexate and fluorouracil; cyto, cytoplasm; Ecad, E-cadherin; FFPE, formalin-fixed, paraffin embedded;HPF, high power field; ID, identifier;IDC, infiltrating ductal carcinoma; IHC, immunohistochemistry; ILC, infiltrating lobular carcinoma; LN, lymph node; n/a, not applicable; memb, membrane; NOD.SCID, non-obese/obese/severe combined immunodeficient mice; NSG, NOD.SCID/IL2Ralpha-/- mice; PE, pleural effusion; vim, vimentin; XRT, X-ray therapy
