# Supplementary material
Source: PubMed Central journal article supplement (PMC3553601)

**Supplementary Table 2. ER+ tumorgrafts retain estrogen dependence and/or responsiveness.**

| Sample ID            | E <sub>2</sub> supplement <sup>1</sup> | Ovariectomy | Frequency of tumor growth |
|----------------------|----------------------------------------|-------------|---------------------------|
| HCI-003              | no                                     | no          | 33%                       |
|                      | yes                                    | no          | 100%                      |
|                      | no                                     | yes         | 0%                        |
|                      | yes                                    | yes         | 50%                       |
| HCI-005              | no                                     | no          | 66%                       |
|                      | yes                                    | no          | 100%                      |
|                      | no                                     | yes         | 33%                       |
|                      | yes                                    | yes         | 100%                      |
| HCI-011 <sup>2</sup> | no                                     | no          | 100%                      |
|                      | yes                                    | no          | 100%                      |
|                      | no                                     | yes         | 100%                      |
|                      | yes                                    | yes         | 100%                      |

<sup>1</sup>estrogen delivered via intrascapular pellets

<sup>2</sup>tumor is not estrogen dependent, but estrogen stimulates growth (see below)

### HCI-011 Estrogen dependent test

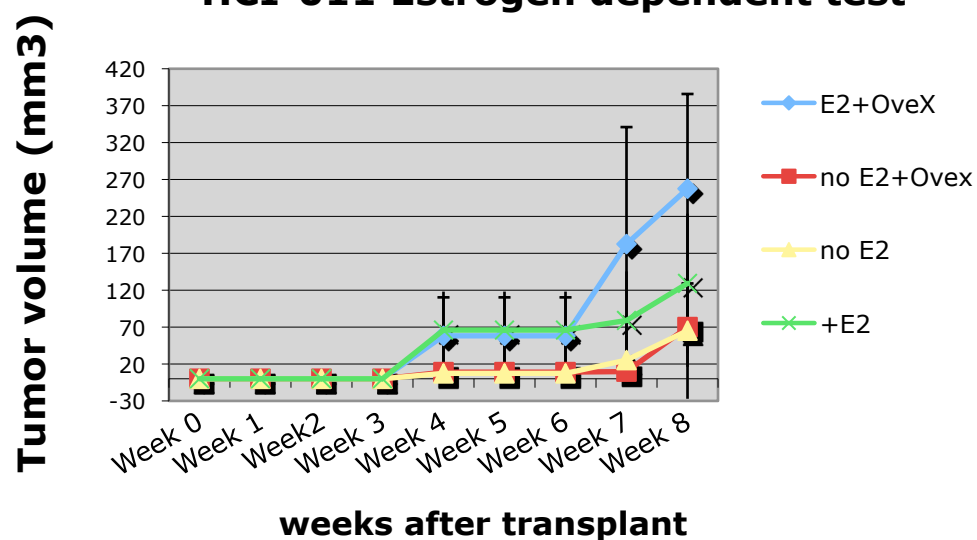

Supplement: NIHMS428588-supplement-Suppl_Table_2.pdf [file NIHMS428588-supplement-Suppl_Table_2.pdf]
