# Supplementary material
Source: PubMed Central journal article supplement (PMC3553601)
Supplement: NIHMS428588-supplement-Suppl_Table_3.pdf [file NIHMS428588-supplement-Suppl_Table_3.pdf]

**Supplementary Table 3. Summary of metastasis from line HCI-011.**

| HCI-011                                   | # mice from which organs sectioned |      | Patient information   |              |
|-------------------------------------------|------------------------------------|------|-----------------------|--------------|
|                                           | lymph nodes                        | lung | metastasis            | vital status |
| 1° graft                                  | 2/3                                | 2/3  | Lymphatics,<br>pleura | Dead         |
| 2° graft                                  | 2/3                                | 2/3  |                       |              |
| 3° graft                                  | 3/3                                | 3/3  |                       |              |
| total                                     | 7/9                                | 7/9  |                       |              |
| frequency                                 | 78%                                | 78%  |                       |              |
| frequency of both LN and lung involvement |                                    | 78%  |                       |              |
